# Supplementary material for: Development of an Event-Specific Droplet Digital PCR Assay for Quantification and Evaluation of the Transgene DNAs in Trace Samples of GM PRNP-Knockout Goat
Source: MDPI journal article supplement (doi:10.3390/foods11060868), 2022-03-18
Supplement: s1 [file s1]

# Supplementary Material

**Table S1.** Information of practical samples.

| Sample type  | Sample name | Animal type   | Goat generation |
|--------------|-------------|---------------|-----------------|
| Milk         | M1          | GM KoP1 event | F3              |
|              | M2          | GM KoP1 event | F4              |
|              | M3          | GM KoP1 event | F3              |
|              | M4          | GM KoP1 event | F5              |
| Fresh Faces  | F1          | GM KoP1 event | F3              |
|              | F2          | GM KoP1 event | F2              |
|              | F3          | GM KoP1 event | F2              |
|              | F4          | GM KoP1 event | F3              |
|              | F5          | GM KoP1 event | F3              |
|              | F6          | GM KoP1 event | F4              |
|              | F7          | GM KoP1 event | F4              |
|              | F8          | GM KoP1 event | F4              |
|              | F9          | GM KoP1 event | F5              |
|              | F10         | GM KoP1 event | F5              |
|              | F11         | GM KoP1 event | F5              |
|              | F12         | GM KoP1 event | F5              |
|              | F13         | GM KoP1 event | F5              |
|              | F14         | GM KoP1 event | F5              |
|              | F15         | GM KoP1 event | F5              |
|              | F16         | GM KoP1 event | F5              |
|              | F17         | Non-GM        | /               |
|              | F18         | Non-GM        | /               |
| Compost Soil | S1          | GM KoP1 event | /               |
|              | S2          | GM KoP1 event | /               |
|              | S3          | GM KoP1 event | /               |
|              | S4          | GM KoP1 event | /               |
|              | S5          | GM KoP1 event | /               |
